# Supplementary material for: Limits to the world’s green water resources for food, feed, fiber, timber, and bioenergy
Source: PubMed Central journal article supplement — Proc Natl Acad Sci U S A. 2019 Feb 25;116(11):4893–8. doi: 10.1073/pnas.1817380116 (PMC6421454; doi:10.1073/pnas.1817380116), 2019-02-25
Supplement: pnas.1817380116.sapp.pdf [file pnas.1817380116.sapp.pdf]

## Supplementary Information for

Limits to the world's green water resources for food, feed, fiber, timber, and bioenergy

Joep F. Schyns, Arjen Y. Hoekstra, Martijn J. Booij, Rick J. Hogeboom, Mesfin M. Mekonnen

Joep F. Schyns

Email: [j.f.schyns@utwente.nl](mailto:j.f.schyns@utwente.nl)

### **This PDF file includes:**

Figures S1 and S2 (page 2)

Tables S1 to S4 (pages 3 to 12)

Supplementary Materials and Methods (pages 13 to 18)

References for SI (pages 18 to 20)

## Supplementary Figures

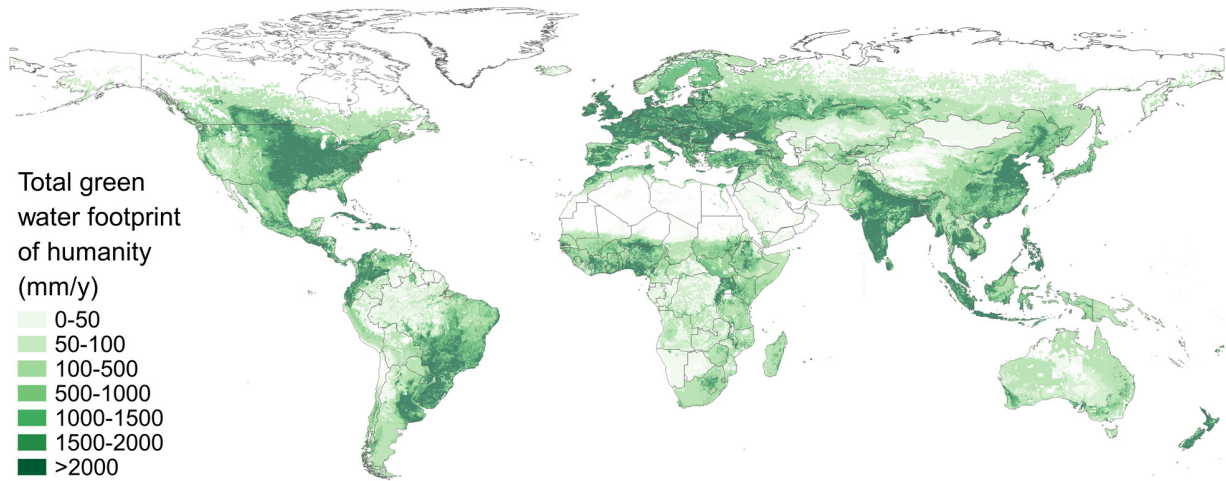

**Figure S1.** Total green water footprint of humanity in  $\text{mm y}^{-1}$  on a 5 x 5 arc minute grid. Sum of the green water footprints (in  $\text{m}^3 \text{y}^{-1}$ ) of crop production, livestock grazing, wood production and urban areas, divided by the grid cell area.

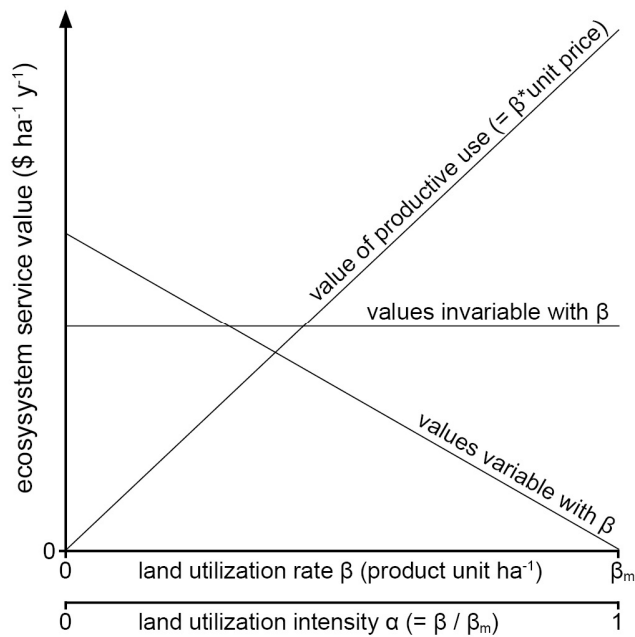

**Figure S2.** Conceptual relationships between the value of ecosystems services and the actual ( $\beta$ ) and maximum sustainable ( $\beta_m$ ) land utilization rate (following Schyns et al. (1), assumed to be linear in this study due to lack of data).

## Supplementary Tables

**Table S1.** Green water scarcity and actual and maximum sustainable green water footprints per country.

| Country                | Actual green water footprint (km <sup>3</sup> y <sup>-1</sup> ) | Maximum sustainable green water footprint (km <sup>3</sup> y <sup>-1</sup> ) | Green water scarcity (-)* | Overshoot as % of the actual green water footprint (%) |
|------------------------|-----------------------------------------------------------------|------------------------------------------------------------------------------|---------------------------|--------------------------------------------------------|
| Afghanistan            | 16                                                              | 27                                                                           | 0.58                      | 16                                                     |
| Albania                | 3.5                                                             | 2.8                                                                          | 1.3                       | 58                                                     |
| Algeria                | 22                                                              | 47                                                                           | 0.46                      | 5.0                                                    |
| American Samoa         | 0                                                               | 0                                                                            | 1.0                       | 0                                                      |
| Andorra                | 0.020                                                           | 0.0046                                                                       | 4.5                       | 86                                                     |
| Angola                 | 17                                                              | 170                                                                          | 0.098                     | 13                                                     |
| Antigua and Barbuda    | 0.072                                                           | 0.14                                                                         | 0.51                      | 36                                                     |
| Argentina              | 260                                                             | 460                                                                          | 0.58                      | 6.7                                                    |
| Armenia                | 3.5                                                             | 4.1                                                                          | 0.86                      | 31                                                     |
| Australia              | 170                                                             | 740                                                                          | 0.23                      | 16                                                     |
| Austria                | 22                                                              | 32                                                                           | 0.68                      | 4.9                                                    |
| Azerbaijan             | 8.8                                                             | 12                                                                           | 0.71                      | 24                                                     |
| Bahamas                | 0.11                                                            | 0.37                                                                         | 0.29                      | 48                                                     |
| Bahrain                | 0.018                                                           | 0.019                                                                        | 0.97                      | 0                                                      |
| Bangladesh             | 70                                                              | 67                                                                           | 1.0                       | 13                                                     |
| Barbados               | 0.21                                                            | 0.30                                                                         | 0.69                      | 36                                                     |
| Belarus                | 34                                                              | 58                                                                           | 0.58                      | 7.2                                                    |
| Belgium                | 6.8                                                             | 5.6                                                                          | 1.2                       | 35                                                     |
| Belize                 | 0.81                                                            | 1.4                                                                          | 0.58                      | 43                                                     |
| Benin                  | 12                                                              | 26                                                                           | 0.48                      | 5.0                                                    |
| Bhutan                 | 1.7                                                             | 0.61                                                                         | 2.8                       | 85                                                     |
| Bolivia                | 21                                                              | 110                                                                          | 0.20                      | 30                                                     |
| Bosnia and Herzegovina | 8.9                                                             | 18                                                                           | 0.50                      | 13                                                     |
| Botswana               | 1.7                                                             | 23                                                                           | 0.072                     | 7.1                                                    |
| Brazil                 | 870                                                             | 1700                                                                         | 0.51                      | 14                                                     |
| British Virgin Islands | 0.0020                                                          | 0.0020                                                                       | 1.0                       | 0                                                      |
| Brunei                 | 0.40                                                            | 0.24                                                                         | 1.6                       | 51                                                     |
| Bulgaria               | 22                                                              | 29                                                                           | 0.76                      | 13                                                     |
| Burkina Faso           | 25                                                              | 68                                                                           | 0.37                      | 7.6                                                    |
| Burundi                | 6.5                                                             | 8.6                                                                          | 0.75                      | 20                                                     |
| Cambodia               | 16                                                              | 22                                                                           | 0.73                      | 21                                                     |
| Cameroon               | 32                                                              | 45                                                                           | 0.70                      | 41                                                     |
| Canada                 | 250                                                             | 1000                                                                         | 0.25                      | 6.2                                                    |
| Cape Verde             | 0.17                                                            | 0.11                                                                         | 1.5                       | 58                                                     |
| Cayman Islands         | 0.016                                                           | 0.00059                                                                      | 27                        | 96                                                     |

*Continues on next page*

**Table S1 (continued).** Green water scarcity and actual and maximum sustainable green water footprints per country.

| Country                  | Actual green water footprint (km <sup>3</sup> y <sup>-1</sup> ) | Maximum sustainable green water footprint (km <sup>3</sup> y <sup>-1</sup> ) | Green water scarcity (-)* | Overshoot as % of the actual green water footprint (%) |
|--------------------------|-----------------------------------------------------------------|------------------------------------------------------------------------------|---------------------------|--------------------------------------------------------|
| Central African Republic | 7.5                                                             | 45                                                                           | 0.17                      | 8.9                                                    |
| Chad                     | 16                                                              | 82                                                                           | 0.19                      | 6.6                                                    |
| Chile                    | 27                                                              | 42                                                                           | 0.63                      | 21                                                     |
| China                    | 950                                                             | 1500                                                                         | 0.65                      | 9.2                                                    |
| Colombia                 | 160                                                             | 230                                                                          | 0.68                      | 55                                                     |
| Comoros                  | 0.92                                                            | 0.16                                                                         | 5.9                       | 84                                                     |
| Congo                    | 1.8                                                             | 32                                                                           | 0.055                     | 8.9                                                    |
| Congo, DRC               | 35                                                              | 190                                                                          | 0.18                      | 14                                                     |
| Cook Islands             | 0                                                               | 0                                                                            | 1.0                       | 0                                                      |
| Costa Rica               | 19                                                              | 6.4                                                                          | 3.0                       | 78                                                     |
| Côte d'Ivoire            | 49                                                              | 77                                                                           | 0.64                      | 16                                                     |
| Croatia                  | 12                                                              | 18                                                                           | 0.70                      | 21                                                     |
| Cuba                     | 27                                                              | 23                                                                           | 1.2                       | 41                                                     |
| Cyprus                   | 0.43                                                            | 0.19                                                                         | 2.3                       | 72                                                     |
| Czech Republic           | 24                                                              | 23                                                                           | 1.0                       | 24                                                     |
| Denmark                  | 9.1                                                             | 6.3                                                                          | 1.4                       | 43                                                     |
| Djibouti                 | 0.15                                                            | 0.13                                                                         | 1.2                       | 29                                                     |
| Dominica                 | 0.24                                                            | 0.12                                                                         | 2.0                       | 54                                                     |
| Dominican Republic       | 14                                                              | 6.5                                                                          | 2.2                       | 71                                                     |
| Ecuador                  | 46                                                              | 6.6                                                                          | 7.0                       | 91                                                     |
| Egypt                    | 7.5                                                             | 6.3                                                                          | 1.2                       | 17                                                     |
| El Salvador              | 9.5                                                             | 11                                                                           | 0.88                      | 16                                                     |
| Equatorial Guinea        | 0.96                                                            | 2.2                                                                          | 0.43                      | 47                                                     |
| Eritrea                  | 2.6                                                             | 7.2                                                                          | 0.37                      | 2.6                                                    |
| Estonia                  | 6.9                                                             | 7.8                                                                          | 0.88                      | 33                                                     |
| Ethiopia                 | 97                                                              | 150                                                                          | 0.64                      | 21                                                     |
| Faroe Islands            | 0.0013                                                          | 0.000058                                                                     | 23                        | 96                                                     |
| Fiji                     | 2.7                                                             | 0.75                                                                         | 3.6                       | 86                                                     |
| Finland                  | 35                                                              | 81                                                                           | 0.43                      | 6.5                                                    |
| France                   | 130                                                             | 140                                                                          | 0.91                      | 17                                                     |
| French Guiana            | 0.38                                                            | 0.45                                                                         | 0.85                      | 63                                                     |
| French Polynesia         | 0                                                               | 0                                                                            | 1.0                       | 0                                                      |
| Gabon                    | 1.9                                                             | 28                                                                           | 0.067                     | 11                                                     |
| Georgia                  | 8.6                                                             | 18                                                                           | 0.47                      | 21                                                     |
| Germany                  | 92                                                              | 52                                                                           | 1.8                       | 60                                                     |
| Ghana                    | 37                                                              | 66                                                                           | 0.56                      | 19                                                     |
| Greece                   | 23                                                              | 20                                                                           | 1.2                       | 30                                                     |

*Continues on next page*

**Table S1 (continued).** Green water scarcity and actual and maximum sustainable green water footprints per country.

| Country       | Actual green water footprint (km <sup>3</sup> y <sup>-1</sup> ) | Maximum sustainable green water footprint (km <sup>3</sup> y <sup>-1</sup> ) | Green water scarcity (-)* | Overshoot as % of the actual green water footprint (%) |
|---------------|-----------------------------------------------------------------|------------------------------------------------------------------------------|---------------------------|--------------------------------------------------------|
| Grenada       | 0.15                                                            | 0.0013                                                                       | 110                       | 99                                                     |
| Guadeloupe    | 0.47                                                            | 0.11                                                                         | 4.4                       | 89                                                     |
| Guam          | 0.13                                                            | 0.083                                                                        | 1.6                       | 36                                                     |
| Guatemala     | 22                                                              | 14                                                                           | 1.5                       | 70                                                     |
| Guinea        | 19                                                              | 61                                                                           | 0.31                      | 14                                                     |
| Guinea-Bissau | 2.8                                                             | 7.3                                                                          | 0.39                      | 18                                                     |
| Guyana        | 2.7                                                             | 29                                                                           | 0.095                     | 5.8                                                    |
| Haiti         | 8.9                                                             | 3.3                                                                          | 2.7                       | 65                                                     |
| Honduras      | 15                                                              | 11                                                                           | 1.4                       | 59                                                     |
| Hungary       | 26                                                              | 30                                                                           | 0.86                      | 5.3                                                    |
| Iceland       | 0.59                                                            | 5.8                                                                          | 0.10                      | 9.5                                                    |
| India         | 810                                                             | 890                                                                          | 0.92                      | 11                                                     |
| Indonesia     | 340                                                             | 320                                                                          | 1.1                       | 33                                                     |
| Iran          | 72                                                              | 100                                                                          | 0.69                      | 10                                                     |
| Iraq          | 11                                                              | 17                                                                           | 0.66                      | 8.3                                                    |
| Ireland       | 14                                                              | 19                                                                           | 0.78                      | 6.3                                                    |
| Israel        | 2.5                                                             | 2.5                                                                          | 0.99                      | 23                                                     |
| Italy         | 69                                                              | 77                                                                           | 0.90                      | 20                                                     |
| Jamaica       | 4.2                                                             | 0.86                                                                         | 4.9                       | 83                                                     |
| Japan         | 51                                                              | 130                                                                          | 0.40                      | 27                                                     |
| Jordan        | 1.1                                                             | 0.96                                                                         | 1.1                       | 31                                                     |
| Kazakhstan    | 72                                                              | 270                                                                          | 0.27                      | 2.6                                                    |
| Kenya         | 56                                                              | 75                                                                           | 0.74                      | 21                                                     |
| Kuwait        | 0.16                                                            | 0.12                                                                         | 1.4                       | 33                                                     |
| Kyrgyzstan    | 11                                                              | 23                                                                           | 0.46                      | 11                                                     |
| Laos          | 6.9                                                             | 13                                                                           | 0.53                      | 40                                                     |
| Latvia        | 12                                                              | 14                                                                           | 0.85                      | 23                                                     |
| Lebanon       | 1.2                                                             | 1.2                                                                          | 0.99                      | 26                                                     |
| Lesotho       | 1.7                                                             | 7.1                                                                          | 0.24                      | 27                                                     |
| Liberia       | 4.8                                                             | 11                                                                           | 0.43                      | 27                                                     |
| Libya         | 3.0                                                             | 6.4                                                                          | 0.47                      | 2.3                                                    |
| Liechtenstein | 0.056                                                           | 0.028                                                                        | 2.0                       | 78                                                     |
| Lithuania     | 14                                                              | 15                                                                           | 0.94                      | 23                                                     |
| Luxembourg    | 0.76                                                            | 0.89                                                                         | 0.86                      | 11                                                     |
| Macedonia     | 3.8                                                             | 6.6                                                                          | 0.57                      | 13                                                     |
| Madagascar    | 29                                                              | 100                                                                          | 0.29                      | 49                                                     |
| Malawi        | 13                                                              | 17                                                                           | 0.75                      | 43                                                     |

*Continues on next page*

**Table S1 (continued).** Green water scarcity and actual and maximum sustainable green water footprints per country.

| Country          | Actual green water footprint (km <sup>3</sup> y <sup>-1</sup> ) | Maximum sustainable green water footprint (km <sup>3</sup> y <sup>-1</sup> ) | Green water scarcity (-)* | Overshoot as % of the actual green water footprint (%) |
|------------------|-----------------------------------------------------------------|------------------------------------------------------------------------------|---------------------------|--------------------------------------------------------|
| Malaysia         | 89                                                              | 54                                                                           | 1.6                       | 49                                                     |
| Mali             | 26                                                              | 90                                                                           | 0.29                      | 6.6                                                    |
| Malta            | 0.056                                                           | 0.030                                                                        | 1.9                       | 70                                                     |
| Martinique       | 0.41                                                            | 0.22                                                                         | 1.9                       | 72                                                     |
| Mauritania       | 3.6                                                             | 6.7                                                                          | 0.54                      | 0                                                      |
| Mauritius        | 0.80                                                            | 0.46                                                                         | 1.7                       | 69                                                     |
| Mexico           | 180                                                             | 230                                                                          | 0.77                      | 39                                                     |
| Micronesia       | 0                                                               | 0                                                                            | 1.0                       | 0                                                      |
| Moldova          | 7.9                                                             | 9.1                                                                          | 0.87                      | 2.7                                                    |
| Monaco           | 0.0024                                                          | 0.0024                                                                       | 1.0                       | 0                                                      |
| Mongolia         | 2.4                                                             | 48                                                                           | 0.049                     | 9.9                                                    |
| Montenegro       | 3.4                                                             | 3.8                                                                          | 0.90                      | 29                                                     |
| Montserrat       | 0.014                                                           | 0.014                                                                        | 1.0                       | 0                                                      |
| Morocco          | 30                                                              | 42                                                                           | 0.73                      | 14                                                     |
| Mozambique       | 26                                                              | 210                                                                          | 0.12                      | 12                                                     |
| Myanmar          | 81                                                              | 95                                                                           | 0.85                      | 24                                                     |
| Namibia          | 2.4                                                             | 28                                                                           | 0.085                     | 3.5                                                    |
| Nepal            | 27                                                              | 15                                                                           | 1.8                       | 51                                                     |
| Netherlands      | 8.7                                                             | 3.4                                                                          | 2.5                       | 67                                                     |
| New Caledonia    | 0.17                                                            | 0.22                                                                         | 0.77                      | 71                                                     |
| New Zealand      | 66                                                              | 40                                                                           | 1.6                       | 52                                                     |
| Nicaragua        | 16                                                              | 27                                                                           | 0.61                      | 33                                                     |
| Niger            | 48                                                              | 54                                                                           | 0.89                      | 1.1                                                    |
| Nigeria          | 210                                                             | 300                                                                          | 0.70                      | 11                                                     |
| Niue             | 0                                                               | 0                                                                            | 1.0                       | 0                                                      |
| North Korea      | 18                                                              | 45                                                                           | 0.41                      | 3.9                                                    |
| Norway           | 9.3                                                             | 43                                                                           | 0.22                      | 25                                                     |
| Oman             | 0.57                                                            | 0.43                                                                         | 1.3                       | 37                                                     |
| Pakistan         | 57                                                              | 62                                                                           | 0.91                      | 8.6                                                    |
| Palau            | 0                                                               | 0.0092                                                                       | 0                         | 0                                                      |
| Panama           | 7.5                                                             | 5.4                                                                          | 1.4                       | 71                                                     |
| Papua New Guinea | 8.9                                                             | 21                                                                           | 0.42                      | 56                                                     |
| Paraguay         | 42                                                              | 130                                                                          | 0.32                      | 3.6                                                    |
| Peru             | 29                                                              | 91                                                                           | 0.32                      | 55                                                     |
| Philippines      | 120                                                             | 44                                                                           | 2.6                       | 67                                                     |
| Poland           | 84                                                              | 100                                                                          | 0.83                      | 14                                                     |
| Portugal         | 15                                                              | 15                                                                           | 1.0                       | 15                                                     |

*Continues on next page*

**Table S1 (continued).** Green water scarcity and actual and maximum sustainable green water footprints per country.

| Country                        | Actual green water footprint (km <sup>3</sup> y <sup>-1</sup> ) | Maximum sustainable green water footprint (km <sup>3</sup> y <sup>-1</sup> ) | Green water scarcity (-)* | Overshoot as % of the actual green water footprint (%) |
|--------------------------------|-----------------------------------------------------------------|------------------------------------------------------------------------------|---------------------------|--------------------------------------------------------|
| Puerto Rico                    | 2.5                                                             | 1.0                                                                          | 2.4                       | 66                                                     |
| Qatar                          | 0.056                                                           | 0.062                                                                        | 0.90                      | 0                                                      |
| Réunion                        | 0.35                                                            | 0.12                                                                         | 2.9                       | 80                                                     |
| Romania                        | 60                                                              | 73                                                                           | 0.83                      | 7.9                                                    |
| Russia                         | 520                                                             | 1900                                                                         | 0.27                      | 6.6                                                    |
| Rwanda                         | 9.5                                                             | 7.2                                                                          | 1.3                       | 37                                                     |
| Saint Pierre et Miquelon       | 0.00040                                                         | 0.00040                                                                      | 1.0                       | 0                                                      |
| Samoa                          | 0                                                               | 0.070                                                                        | 0                         | 0                                                      |
| San Marino                     | 0.0038                                                          | 0.019                                                                        | 0.20                      | 0                                                      |
| Sao Tome and Principe          | 0.22                                                            | 0.13                                                                         | 1.7                       | 51                                                     |
| Saudi Arabia                   | 5.5                                                             | 5.2                                                                          | 1.1                       | 15                                                     |
| Senegal                        | 10                                                              | 24                                                                           | 0.42                      | 4.2                                                    |
| Serbia                         | 17                                                              | 25                                                                           | 0.69                      | 3.8                                                    |
| Seychelles                     | 0.012                                                           | 0                                                                            | 1.0                       | 100                                                    |
| Sierra Leone                   | 5.7                                                             | 13                                                                           | 0.43                      | 17                                                     |
| Singapore                      | 0.31                                                            | 0.31                                                                         | 0.99                      | 0                                                      |
| Slovakia                       | 10                                                              | 12                                                                           | 0.85                      | 18                                                     |
| Slovenia                       | 5.1                                                             | 6                                                                            | 0.85                      | 40                                                     |
| Solomon Is.                    | 0.75                                                            | 0.94                                                                         | 0.80                      | 68                                                     |
| Somalia                        | 20                                                              | 30                                                                           | 0.65                      | 7.3                                                    |
| South Africa                   | 65                                                              | 150                                                                          | 0.43                      | 20                                                     |
| South Korea                    | 18                                                              | 36                                                                           | 0.50                      | 25                                                     |
| South Sudan                    | 51                                                              | 150                                                                          | 0.34                      | 8.0                                                    |
| Spain                          | 83                                                              | 89                                                                           | 0.93                      | 11                                                     |
| Sri Lanka                      | 21                                                              | 7.8                                                                          | 2.7                       | 73                                                     |
| St. Kitts and Nevis            | 0.064                                                           | 0.00069                                                                      | 92                        | 99                                                     |
| St. Lucia                      | 0.016                                                           | 0.063                                                                        | 0.25                      | 0                                                      |
| St. Vincent and the Grenadines | 0.13                                                            | 0.14                                                                         | 0.91                      | 0                                                      |
| Sudan                          | 67                                                              | 140                                                                          | 0.47                      | 2.0                                                    |
| Suriname                       | 0.57                                                            | 7.2                                                                          | 0.080                     | 56                                                     |
| Swaziland                      | 1.6                                                             | 5.2                                                                          | 0.31                      | 16                                                     |
| Sweden                         | 52                                                              | 110                                                                          | 0.47                      | 9.8                                                    |
| Switzerland                    | 9.7                                                             | 8.0                                                                          | 1.2                       | 46                                                     |
| Syria                          | 21                                                              | 23                                                                           | 0.91                      | 3.6                                                    |
| Taiwan                         | 5.6                                                             | 4.2                                                                          | 1.3                       | 53                                                     |
| Tajikistan                     | 4.9                                                             | 8.6                                                                          | 0.57                      | 7.5                                                    |
| Tanzania                       | 52                                                              | 170                                                                          | 0.31                      | 31                                                     |

*Continues on next page*

**Table S1 (continued).** Green water scarcity and actual and maximum sustainable green water footprints per country.

| Country                      | Actual green water footprint (km <sup>3</sup> y <sup>-1</sup> ) | Maximum sustainable green water footprint (km <sup>3</sup> y <sup>-1</sup> ) | Green water scarcity (-)* | Overshoot as % of the actual green water footprint (%) |
|------------------------------|-----------------------------------------------------------------|------------------------------------------------------------------------------|---------------------------|--------------------------------------------------------|
| Thailand                     | 120                                                             | 120                                                                          | 1.0                       | 24                                                     |
| The Gambia                   | 1.3                                                             | 3.0                                                                          | 0.41                      | 0                                                      |
| Timor Leste                  | 1.2                                                             | 0.24                                                                         | 5.0                       | 90                                                     |
| Togo                         | 7.2                                                             | 13                                                                           | 0.55                      | 13                                                     |
| Tonga                        | 0                                                               | 0.083                                                                        | 0                         | 0                                                      |
| Trinidad and Tobago          | 0.90                                                            | 0.43                                                                         | 2.1                       | 70                                                     |
| Tunisia                      | 19                                                              | 22                                                                           | 0.86                      | 3.9                                                    |
| Turkey                       | 120                                                             | 170                                                                          | 0.74                      | 13                                                     |
| Turkmenistan                 | 9.5                                                             | 24                                                                           | 0.40                      | 10                                                     |
| Uganda                       | 52                                                              | 66                                                                           | 0.78                      | 13                                                     |
| Ukraine                      | 130                                                             | 160                                                                          | 0.83                      | 5.6                                                    |
| United Arab Emirates         | 2.6                                                             | 2.6                                                                          | 1.0                       | 3.3                                                    |
| United Kingdom               | 61                                                              | 48                                                                           | 1.3                       | 42                                                     |
| United States                | 1300                                                            | 1900                                                                         | 0.71                      | 11                                                     |
| United States Virgin Islands | 0.061                                                           | 0.10                                                                         | 0.59                      | 0                                                      |
| Uruguay                      | 37                                                              | 68                                                                           | 0.54                      | 9.4                                                    |
| Uzbekistan                   | 27                                                              | 29                                                                           | 0.91                      | 5.8                                                    |
| Vanuatu                      | 1.0                                                             | 0.46                                                                         | 2.2                       | 78                                                     |
| Venezuela                    | 47                                                              | 110                                                                          | 0.43                      | 33                                                     |
| Vietnam                      | 76                                                              | 59                                                                           | 1.3                       | 37                                                     |
| Wallis and Futuna            | 0                                                               | 0                                                                            | 1.0                       | 0                                                      |
| Yemen                        | 4.5                                                             | 4.1                                                                          | 1.1                       | 24                                                     |
| Zambia                       | 12                                                              | 79                                                                           | 0.15                      | 16                                                     |
| Zimbabwe                     | 18                                                              | 67                                                                           | 0.26                      | 13                                                     |

\* If the maximum sustainable green water footprint is zero, green water scarcity is mathematically undefined. Since in such cases no green water remains to be allocated to human activities, we then set green water scarcity to 1.0.



**Table S2.** Materials used for estimating the green water footprint of livestock grazing.

| <b>Variable</b>                                                                           | <b>Source dataset(s)</b>                                                                                | <b>Operation(s)/remarks</b>                                                                                                                                                                                                                                                     |
|-------------------------------------------------------------------------------------------|---------------------------------------------------------------------------------------------------------|---------------------------------------------------------------------------------------------------------------------------------------------------------------------------------------------------------------------------------------------------------------------------------|
| Area of permanent meadows and pastures (5 x 5 arc minute)                                 | Klein Goldewijk et al. (2)                                                                              | Linear interpolation between 2000 and 2005 and constant for 2005-2009.                                                                                                                                                                                                          |
| Area of harvested fodder grasses (5 x 5 arc minute)                                       | Portmann et al. (3)                                                                                     | Clipped with the area of permanent meadows and pastures and then scaled to national annual statistics on harvested area of fodder grasses.                                                                                                                                      |
| National annual statistics on harvested area of fodder grasses                            | FAOSTAT ( <a href="http://www.fao.org/faostat/en/#data/QC">http://www.fao.org/faostat/en/#data/QC</a> ) | Sum of FAOSTAT crop codes: 639 (grasses, nes), 640 (clover), and 50% of 651 (mixed grasses and legumes).                                                                                                                                                                        |
| Density of cattle, goats and sheep representative of the year 2006 (0.5 x 0.5 arc minute) | Robinson et al. (4)                                                                                     | See section S3.1. For asses, camels, horses, llamas and mules, we used the distribution of cattle due to lack of animal-specific distribution maps.                                                                                                                             |
| Density of buffaloes representative of the year 2005 (3 x 3 arc minute)                   | Wint & Robinson (5)                                                                                     | See section S3.1.                                                                                                                                                                                                                                                               |
| Ruminant production systems representative of the year 2011 (0.5 x 0.5 arc minute)        | Bouwman et al. (6)                                                                                      | The production systems are grouped into the two systems (pastoral and mixed/landless) as distinguished by Bouwman et al. (6).                                                                                                                                                   |
| Production per system in 1970 and 1995 (per animal category, per world region)            | Bouwman et al. (6)                                                                                      | Annual rate of change of the fraction of production in the pastoral system is derived. This rate is applied to the estimated livestock distribution map, assuming no change if a grid cell is classified as either 100% pastoral or 100% mixed/landless by Robinson et al. (7). |
| Actual annual evapotranspiration rate of grazed grass (30 x 30 arc minute)                | Rolinski et al. (8)                                                                                     | Daily grazing option under livestock density that results in the highest grass yield. Assumed to be fully green (no irrigation).                                                                                                                                                |

*Continues on next page*

**Table S2 (continued).** Materials used for estimating the green water footprint of livestock grazing.

| Variable                                                                                        | Source dataset(s)                                                                                       | Operation(s)/remarks                                                                                                                                                                                                                                                                                                                              |
|-------------------------------------------------------------------------------------------------|---------------------------------------------------------------------------------------------------------|---------------------------------------------------------------------------------------------------------------------------------------------------------------------------------------------------------------------------------------------------------------------------------------------------------------------------------------------------|
| Sustainable grass yield (30 x 30 arc minute)                                                    | Rolinski et al. (8)                                                                                     | Daily grazing option under livestock density that results in the highest grass yield.<br>Conversion from carbon mass units (C) to grass dry matter (DM) using $C = 0.45DM$ . If in a grid cell that is grazed according to our estimates the sustainable grass yield is zero, we set it to $0.0001 \text{ t dry matter ha}^{-1} \text{ y}^{-1}$ . |
| National annual statistics on meat/milk production (per animal category)                        | FAOSTAT ( <a href="http://www.fao.org/faostat/en/#data/QL">http://www.fao.org/faostat/en/#data/QL</a> ) | The total meat/milk production per animal category is distributed over the two production systems based on the number of heads per system.                                                                                                                                                                                                        |
| Feed conversion efficiencies (per world region, per animal category, per production system)     | Bouwman et al. (6)                                                                                      | Linear interpolation between values reported for 1995 and 2030.                                                                                                                                                                                                                                                                                   |
| Fraction of grass in animal feed (per world region, per animal category, per production system) | Bouwman et al. (6)                                                                                      | Linear interpolation between values reported for 1995 and 2030.                                                                                                                                                                                                                                                                                   |
| National annual statistics on production of fodder grasses                                      | FAOSTAT ( <a href="http://www.fao.org/faostat/en/#data/QC">http://www.fao.org/faostat/en/#data/QC</a> ) | Sum of FAOSTAT crop codes: 639 (grasses), 640 (clover), and 50% of 651 (mixed grasses and legumes). Assuming that reported weights represent fresh weight incl. 15% moisture.                                                                                                                                                                     |
| Value fraction of meat and milk production from grazing pastures                                | Costanza et al. (9)                                                                                     | See section S2.                                                                                                                                                                                                                                                                                                                                   |

**Table S3.** Ecosystem service values for the reference year 2011. Values are in 2007 US dollars.

|                                                                                                                 | Grasslands <sup>a</sup> | Grazed grasslands  | Non-grazed grasslands |
|-----------------------------------------------------------------------------------------------------------------|-------------------------|--------------------|-----------------------|
| Area in 2011 (10 <sup>6</sup> ha)                                                                               | 4,418                   | 3,111              | 1,307                 |
| Average intensity of grazing ( $\alpha$ ) in 2011 (-)                                                           | -                       | 0.35               | -                     |
| Actual meat and milk production from grazing livestock in 2011 (10 <sup>6</sup> t y <sup>-1</sup> )             | -                       | 820                | -                     |
| Ecosystem values that are invariable with $\alpha^b$ ( $V_1$ ) (\$ ha <sup>-1</sup> y <sup>-1</sup> )           | 1,603                   | 1,569              | 1,569                 |
| Ecosystem values that are inversely proportional to $\alpha^c$ ( $V_2$ ) (\$ ha <sup>-1</sup> y <sup>-1</sup> ) | 1,317                   | 1,168 <sup>d</sup> | 1,788 <sup>d</sup>    |
| Value of meat and milk production <sup>e</sup> ( $V_3$ ) (\$ ha <sup>-1</sup> y <sup>-1</sup> )                 | 1,246                   | 1,769 <sup>f</sup> | -                     |
| Value of meat and milk production ( $V_3^*$ ) (\$ t <sup>-1</sup> y <sup>-1</sup> )                             |                         | 6,682 <sup>g</sup> | -                     |

<sup>a</sup> Data from Costanza et al. (9) for 2011.

<sup>b</sup> Services included in this category: gas regulation, climate regulation, water regulation, water supply, nutrient cycling, waste treatment, genetic resources, cultural.

<sup>c</sup> Services included in this category: erosion control, soil formation, pollination, biological control, habitat/refugia, recreation.

<sup>d</sup> Estimated based on the average  $\alpha$  in 2011 – assuming a linear relation between  $V_2$  and  $\beta$  and furthermore assuming that  $V_2 = 0$  when  $\alpha = 1$  – such that the area-weighted average of  $V_2$  for grazed and non-grazed lands equals  $V_2$  for the entire biome (column 2), resulting in the relationship:  $V_2 = -\delta\alpha + \delta$  with  $\delta = 1,788$ . This equation is used to estimate  $V_2$  per country per year.

<sup>e</sup> We assume that the value of the services food production and raw materials on grasslands primarily reflect the value of meat and milk production.

<sup>f</sup> Estimated by first calculating the total value of  $V_3$  (\$ y<sup>-1</sup>) for the reference year according to Costanza et al. (9), by multiplying the value per ha with the area (both as reported by Costanza et al. (9)) and subsequently dividing the total value of  $V_3$  by the estimated grazed land area in 2011. We estimate  $V_3$  per country per year as  $[V_3^*] \cdot Q / A$  where  $A$  is the grazed pasture area (ha) and  $Q$  is the country total meat and milk production (t y<sup>-1</sup>).

<sup>g</sup> Estimated by first calculating the total value of  $V_3$  (\$ y<sup>-1</sup>) for the reference year and subsequently dividing the total value of  $V_3$  by the actual meat and milk production from grazing livestock in 2011.

**Table S4.** Global total water footprint of grazing of this study (column on right hand side) compared to estimates from previous studies.

| Previous studies                        | Period    | Total green water footprint of grazing (km <sup>3</sup> y <sup>-1</sup> ) |                         |
|-----------------------------------------|-----------|---------------------------------------------------------------------------|-------------------------|
|                                         |           | Previous study                                                            | This study <sup>b</sup> |
| Postel et al. (10) <sup>a</sup>         | 1995      | 5,800                                                                     | 2,413                   |
| De Fraiture et al. (11) <sup>b</sup>    | 2000      | 840                                                                       | 2,620                   |
| Rost et al. (12) <sup>a</sup>           | 1971-2002 | 8,258                                                                     | 2,200                   |
| Hanasaki et al. (13) <sup>a</sup>       | 1985-1999 | 12,960                                                                    | 2,323                   |
| Mekonnen and Hoekstra (14) <sup>b</sup> | 1996-2005 | 913                                                                       | 2,683                   |

<sup>a</sup> Refers to total evapotranspiration from grazing lands.

<sup>b</sup> Relates to the grass actually consumed.

## Supplementary Materials and Methods

### S1. Human appropriation of the green water flow

We estimated the human appropriation of the green water flow as the sum of the green water footprints ( $WF_g$ ) of crop production, wood production, livestock grazing and urban areas at a 5 x 5 arc minute grid cell spatial resolution.  $WF_g$  of crop production is estimated for 126 crops with a grid-based soil water balance model at 5 x 5 arc minute spatial resolution taken from Mekonnen & Hoekstra (15). We averaged  $WF_g$  of wood production for 2000-2009 at 30 x 30 arc minute from Schyns et al. (1) and downscaled this to 5 x 5 arc minute. We estimated  $WF_g$  of livestock grazing per year at 5 x 5 arc minute resolution and then averaged it for 2000-2009. A full description of the method to is included in section S3 below. We estimated the  $WF_g$  of urban areas at 5 x 5 arc minute resolution by multiplying the extent of urban areas (16, 17) with the average annual ET rate from urban areas for 2000-2009. The annual ET rate from urban area in grid cell  $x$  is estimated using the formula by Zhang et al. (18) based on the average annual P and potential ET for the period 2000-2009 – both estimated from daily climate data at 30 x 30 arc minute resolution (19) – and a dimensionless coefficient representing plant water availability  $w$ . Based on an average for 386 European cities (20), we assumed urban area is made up of 20%

### S2. Maximum sustainable levels to the human appropriation of the green water flow

Limits to the  $WF_g$  are expressed by maximum sustainable green water footprints ( $WF_{g,m}$ ), which we estimate at 5 x 5 arc minute resolution. To estimate  $WF_{g,m}$  we translate limits to land use into limits to the use of the green water flow. We set aside the green water flow ( $WF_{g,m} = 0$ ) from lands that should be maintained to support natural terrestrial ecosystems (section S2.1), which is similar to the practice of accounting for environmental flow requirements to support natural aquatic ecosystems (21). Furthermore, we estimate  $WF_{g,m}$  based on agro-ecological suitability and accessibility of land, and biophysical constraints to intensifying land-use (section S2.2).

#### S2.1. Land and associated green water flows reserved to maintain terrestrial ecosystems

We set aside lands ( $WF_{g,m} = 0$ ) that have a protected status or have priority to receive that status to achieve the Aichi Biodiversity Target 11. This target has been adopted by the Convention on Biological Diversity and states that the protected area network should be expanded to at least 17% of the terrestrial world by 2020 (<https://www.cbd.int/sp/targets>).

We translate the polygon map of the current protected area network (22) to a 5 x 5 arc minute grid of protected cells (grid cell is considered fully protected if >50% is covered by a protected area polygon). Following Smith et al. (23), we only considered strictly protected areas, including strict nature reserves (IUCN category Ia), wilderness areas (IUCN category Ib) and national parks (IUCN category II). Priority areas for protection, representing the most suitable 17% of the terrestrial land for protection based on conservation value, were obtained from Montesino Pouzols et al. (24) using the map for present land-use conditions.

To complete Fig. 1 in the main manuscript we also estimated the total green water flow from land set aside for nature and non-utilizable lands. We did this using the method proposed by Zhang et al. (18) with  $w = 2.0$  for forest cover and  $w = 0.5$  for grass-like cover (we assumed there is no green water flow from the land cover types permanent wetlands, and snow and ice).

### S2.2. Maximum sustainable green water footprints

We distinguish between lands that are currently utilized to some extent for agriculture, forestry or urban areas, and those lands that are non-utilized at the moment but do have the potential to be used considering a range of constraints.

On lands currently utilized for grazing, we estimate  $WF_{g,m}$  as the green water footprint in the hypothetical situation that the grass consumed by the animals equals the sustainable grass production (8) (Table S2). Similarly, on lands currently utilized for wood production, we estimate  $WF_{g,m}$  as the green water footprint for the case that the actual wood extraction equals the sustainable wood production (1). For current cropland and urban areas, we assume  $WF_{g,m}$  equals the current  $WF_g$ .

We identify non-utilized lands that have the potential to be used for agriculture by checking where all of the following conditions are met: the current land cover (17) is open shrublands, savannas, grasslands, croplands, cropland/natural vegetation, or barren/sparse vegetation (similar to previous studies (23, 25, 26) we do not consider the possibility of agricultural expansion into forests); the land is not set aside for nature; the land is not classified as non-accessible or non-productive (27); the land is agro-ecologically suitable (28); and the land is not already in use (29). After applying these constraints we reduced the resulting area per grid cell by 15% to account for previously unaccounted land uses that reduce the potentially utilizable area (26). We have considered grid cells with a suitability index  $\geq 40$  (range is 0-100; ref. (28)) to be suitable for crop production, the rest is considered suitable for grazing.

In a similar manner and using the same datasets we identify non-utilized lands which have the potential to be used for wood production, in cases where all of the following conditions are met: the current land cover is evergreen needleleaf forest, evergreen broadleaf forest, deciduous needleleaf forest, deciduous broadleaf forest, mixed forest, closed shrublands or woody savannas; the land is not set aside for nature; the land is not classified as non-accessible or non-productive; the average annual forest ET rate  $\geq 100 \text{ mm y}^{-1}$  (1); and the land is not already in use (1). Also here we apply the 15% area reduction per grid cell (see above).

We estimated  $WF_{g,m}$  for potentially utilizable land as the fraction of the annual green water flow (ET) that can be appropriated for human activities. For potentially utilizable cropland, ET is estimated using the method by Zhang et al. (18) with potential crop ET for the FAO reference crop (assuming a crop factor of 1.0) and  $w = 0.5$ . Subsequently, we estimate  $WF_{g,m}$  as the fraction of ET that takes places during the crop growing period. We estimate this fraction at 0.7 based on what previous studies found for the major crops (ref. (13):  $\sim 0.6$ ; ref. (30):  $\sim 0.8$ ). For potentially utilizable forest, ET is estimated using the method by Zhang et al. (18) with potential forest ET estimated according to Komatsu et al. (31) and  $w = 2.0$ . For potentially utilizable grazing land, actual pasture ET is obtained from Rolinski et al. (8). For potentially utilizable forest and grazing land, we estimate  $WF_{g,m}$  as the green water footprint in the case of full utilization of the local sustainable wood and grass production, respectively.

### **S3. Green water footprint of livestock grazing**

We estimated the  $WF_g$  of livestock grazing per year at 5 x 5 arc minute resolution and then averaged it for 2000-2009. First, for the locations where livestock is present (section S3.1) we estimated the area used for grazing as the area of permanent meadows and pastures minus the area of harvested fodder grasses (which are included in  $WF_g$  of crop production, just like crops used for animal feed). Second, we estimated the total green water flow from grazed pastures using the evapotranspiration (ET) rate from grassland under a daily grazing scheme as modelled by Rolinski et al. (8). Third, we attribute only a fraction of the total green water flow from grazed pastures to livestock grazing. We do this using the method by Schyns et al. (1) based on the value of food production on grazed lands with respect to other ecosystem service values generated by pastures (section S3.2), which depends on the intensity of grazing (section S3.3). General data sources and operations are described in Table S2. In section S3.4 we discuss our estimate of  $WF_g$  of livestock grazing in the context of previous lower-resolution assessments.

### S3.1. Spatiotemporal distribution of animal heads per production system

First, we estimated the number of grazing animals at 5 x 5 arc minute resolution for each year in 2000-2009. Second, we determined per grid cell per year the spread of these animals over these two production systems: pastoral and mixed/landless. We considered the following grazing animal categories: dairy cattle, non-dairy cattle, asses, buffaloes, camels, horses, mules, llamas, sheep and goats. We disaggregated national annual statistics on stocks of these animal categories (FAOSTAT; <http://www.fao.org/faostat/en/#data/TA>) to a 5 x 5 arc minute grid, using weights derived from livestock distribution data (4, 5). To obtain the weight per 5 x 5 arc minute grid cell, we first converted livestock densities from these sources – available at a finer resolution – to absolute heads by multiplying density with the grid cell area, and aggregated those numbers to 5 x 5 arc minute resolution. Second, we calculated from this map the weight per grid cell as the ratio of animal heads in the grid cell to the total animals heads present in the country. The spread of the animals over the two production systems per grid cell is based on Robinson et al. (7) and the change in production over these two systems during our study period is estimated based on an annual rate of change derived from Bouwman et al. (6) (Table S2).

### S3.2. Attribution of the green water flow to the productive use based on a value fraction

We follow the value fraction method by Schyns et al. (1) (applied to wood production in forests) to attribute only a part of the annual green water flow to the productive use of grazed pastures, i.e. food production. In general terms, the value fraction is defined as the ratio of the monetary value of the productive use to the total monetary value of the ecosystem services generated on a unit of land. As the land utilization rate ( $\beta$ ) approaches the maximum sustainable land utilization rate ( $\beta_m$ ), the value of the productive use increases, but the value of some of the ecosystem services get reduced, while some other ecosystem services maintain their value irrespective of  $\beta$ . The shape of this relationship (Fig. S2) for various land uses is clearly an avenue of further research. Due to lack of data, we follow Schyns et al. (1) and assume it to be linear for now.

For livestock grazing, we estimated the value fraction of meat and milk production from grazing pastures per country (the uncertainty in the data does justify gridded estimate) for each year in the period 2000-2009. We use global ecosystem service values of grasslands for 2011 (9), which we distribute over grazed and non-grazed grasslands. We then estimate per country per



year the value of meat and milk production and the value of ecosystem services that are inversely proportional to the intensity of grazing (section S3) as described in Table S3.

### S3.3. Grazing intensity

The intensity of grazing ( $\alpha$ ) in a country is estimated per year as the ratio of the total grass consumed through grazing by animals to the sustainable grass production on grazed pastures. The total grass consumed through grazing by animals is estimated backwards from national annual statistics on meat and milk production in two steps. First, we converted meat and milk production per animal category per production system to the associated total grass consumed (including fodder grasses that are not directly grazed, but harvested and fed to livestock later) using feed conversion efficiencies and the fraction of grass in feed (Table S2). Second, we estimated the grass consumed by all animals in a production system and subtracted the production of fodder grasses from the total grass consumed in the intensive system (assuming that fodder grasses are fed to livestock in this system within the country in that year). The sustainable grass production on grazed pastures is estimated by multiplying the area used for grazing with the sustainable grass yield. In cases where  $\alpha$  exceeds one – i.e. grazed grass consumption is larger than the sustainable grass production on grazed pastures – we assumed fully intensive use of the grazed pastures, but limited the grass consumed through grazing to the sustainable grass production on grazed pastures. This happens in small and arid countries with a substantial livestock sector that in practice relies on imported animal feed.

### S3.4. A comparison of this study's estimate of $WF_g$ of livestock grazing with previous work

Our global estimate of  $WF_g$  of livestock grazing falls between previous estimates that considered the total ET from grazing lands and those that take only the fraction of this total that relates to the grass actually consumed (see Table S4). Although our estimate of the total grazed grass consumed is comparable to the one by Mekonnen & Hoekstra (14) ( $2,660 \times 10^6$  t dry matter  $y^{-1}$  in our study vs.  $2,768 \times 10^6$  t dry matter  $y^{-1}$  in theirs), we estimated the WF per unit of grass grazed to be nearly three times larger ( $857 \text{ m}^3 \text{ t}^{-1}$  in our study vs.  $297 \text{ m}^3 \text{ t}^{-1}$  in theirs). Mekonnen & Hoekstra (14) probably underestimated the WF per unit of grass grazed, because they used an average ET rate per country for pasture area and assumed the pasture yield to be 80% of the yield of fodder crops. De Fraiture et al. (11) assumed the WF per unit of grass consumed to be  $750 \text{ m}^3 \text{ t}^{-1}$  dry matter ( $882 \text{ m}^3 \text{ t}^{-1}$ ), but seem to have estimated a much lower total grass consumption when derived backwards from their global  $WF_g$  of grazing ( $840 \text{ km}^3 \text{ y}^{-1} / 750 \text{ m}^3 \text{ t}^{-1}$  dry matter \* 1000 =  $1,120 \times 10^6$  t dry matter  $y^{-1}$ ). Our estimate of total grass consumption seems to be more reasonable, since it not only compares well to Mekonnen & Hoekstra (14), but to

Bouwman et al. (6) for the year 1995 as well ( $2,445 \times 10^6$  t dry matter  $y^{-1}$  in our study vs.  $2,400 \times 10^6$  t dry matter  $y^{-1}$  in theirs). Furthermore, our global estimate of  $WF_g$  of grazing might be higher than the estimates by De Fraiture et al. (11) and Mekonnen & Hoekstra (14), because our estimate of the total ET from grazing lands ( $12.5 \times 10^3$  km<sup>3</sup>  $y^{-1}$  for 1985-1999) is on the high side of the spectrum, similar to that by Hanasaki et al. (13).

## References

1. Schyns JF, Booij, MJ, Hoekstra Y (2017) The water footprint of wood for lumber, pulp, paper, fuel and firewood. *Adv Water Resour* 107:490-501
2. Klein Goldewijk K, Beusen A, van Drecht G, de Vos M (2011) The hyde 3.1 spatially explicit database of human-induced global land-use change over the past 12,000 years. *Glob Ecol Biogeogr* 20(1):73-86.
3. Portmann F, Siebert S, Doll P (2010) Mirca2000 – global monthly irrigated and rainfed crop areas around the year 2000: a new high-resolution data set for agricultural and hydrological modeling. *Glob Biogeochem Cycles* 24(1):GB1011.
4. Robinson TP, et al. (2014) Mapping the global distribution of livestock. *PLoS One* 9:e96084.
5. Wint GRW, Robinson TP (2007) Gridded Livestock of the World (FAO: Rome, 2007), pp 131.
6. Bouwman AF, Van der Hoek KW, Eickhout B, Soenario I (2005) Exploring changes in world ruminant production systems. *Agric Syst* 84(2):121-153.
7. Robinson TP, et al. (2011) Global Livestock Production Systems (FAO & ILRI: Rome, 2011), pp 152.
8. Rolinski S, et al. (2018) Modeling vegetation and carbon dynamics of managed grasslands at the global scale with LPJmL 3.6. *Geosci Model Dev* 11:429-451.
9. Costanza R, et al. (2014) Changes in the global value of ecosystem services. *Glob Environ Change* 26:152-158.
10. Postel SL, Daily GC, Ehrlich PR (1996) Human appropriation of renewable fresh water. *Science* 271(5250):785-788.
11. De Fraiture C, et al. (2007) Looking Ahead to 2050: Scenarios of Alternative Investment Approaches, *Water for Food, Water for Life: A Comprehensive Assessment of Water Management In Agriculture*, ed Molden D. (International Water Management Institute: Colombo, 2007), pp 91-145.

12. Rost S, et al. (2008) Agricultural green and blue water consumption and its influence on the global water system. *Water Resour Res* 44:W09405.
13. Hanasaki N, Inuzuka T, Kanae S, Oki T (2010) An estimation of global virtual water flow and sources of water withdrawal for major crops and livestock products using a global hydrological model. *J Hydrol* 384(3-4):232-244.
14. Mekonnen MM, Hoekstra AY (2012) A global assessment of the water footprint of farm animal products. *Ecosystems* 15(3):401-415.
15. Mekonnen MM, Hoekstra AY (2011) The green, blue and grey water footprint of crops and derived crop products. *Hydrol Earth Syst Sci* 15:1577-1600.
16. Friedl MA, Sulla-Menashe D (2015) MCD12C1 MODIS/Terra+Aqua Land Cover Type Yearly L3 Global 0.05Deg CMG (Version 051). (NASA EOSDIS Land Processes DAAC, USGS EROS Center). Available at: <http://dx.doi.org/10.5067/MODIS/MCD12C1.006>.
17. Friedl MA, et al. (2010) MODIS collection 5 global land cover: algorithm refinements and characterization of new datasets. *Remote Sens Environ* 114(1):168-182.
18. Zhang L, Dawes WR, Walker GR (2001) Response of mean annual evapotranspiration to vegetation changes at catchment scale. *Water Resour Res* 37(3):701-708.
19. De Graaf IEM, van Beek LPH, Wada Y, Bierkens MFP (2014) Dynamic attribution of global water demand to surface water and groundwater resources: effects of abstractions and return flows on river discharges. *Adv Water Resour* 64:21-33.
20. Fuller GA, Gaston KJ (2009) The scaling of green space coverage in European cities. *Biol Lett* 5(3):352-355.
21. Pastor AV, Ludwig F, Biemans H, Hoff H, Kabat P (2014) Accounting for environmental flow requirements in global water assessments. *Hydrol Earth Syst Sci* 18(12):5041-5059.
22. IUCN; UNEP-WCMC (2016) The World Database on Protected Areas (WDPA). (UNEP-WCMC: Cambridge, UK). Available at: <https://www.protectedplanet.net/> (accessed 3 May 2016).
23. Smith WK, Zhao M, Running SW (2012) Global bioenergy capacity as constrained by observed biospheric productivity rates. *BioScience* 62(10):911-922.
24. Montesino Pouzols FM, et al. (2014) Global protected area expansion is compromised by projected land-use and parochialism. *Nature* 516:383-386.
25. Lambin EF & Meyfroidt P (2011) Global land use change, economic globalization, and the looming land scarcity. *Proc Natl Acad Sci USA* 108(9):3465-3472.

26. Eitelberg DA, van Vliet J, Verburg PH (2015) A review of global potentially available cropland estimates and their consequences for model-based assessments. *Glob Change Biol* 21(3):1236-1248.
27. Erb K-H, Gaube V, Krausmann F, Plutzer C, Bondeau A, Haberl H (2007) A comprehensive global 5 min resolution land-use data set for the year 2000 consistent with national census data. *J Land Use Sci* 2(3):191-224.
28. Zabel F, Putzenlechner B, Mauser W (2014) Global agricultural land resources – a high resolution suitability evaluation and its perspectives until 2100 under climate change conditions. *PLoS One* 9:e107522.
29. Ramankutty N, Evan ET, Monfreda C, Foley JA (2008) Farming the planet: 1. geographic distribution of global agricultural lands in the year 2000. *Glob Biogeochem Cycles* 22(1):GB1003.
30. Liu J, Yang H (2010) Spatially explicit assessment of global consumptive water uses in cropland: green and blue water. *J Hydrol* 384(3-4):187-197.
31. Komatsu H, Cho J, Matsumoto K, Otsuki K (2012) Simple modeling of the global variation in annual forest evapotranspiration. *J Hydrol* 420-421:380-390.
